# Supplementary material for: Deep eutectic solvent extraction of myricetin and antioxidant properties
Source: Royal Society of Chemistry journal article supplement (doi:10.1039/d4ra01438c), 2024-01-01
Supplement: d4ra01438c1.pdf [file d4ra01438c1.pdf]

## Supporting Information

### **Deep eutectic solvent extraction of myricetin and antioxidant properties**

Junhai Liu,<sup>\*a</sup> Xiaosha Guo,<sup>a</sup> Qiaowei Miao,<sup>a</sup> Xiaohui Ji,<sup>a</sup> Yinku Liang<sup>a</sup> and Tianjiao Tong<sup>a</sup>

<sup>a</sup>Shaanxi Key Laboratory of Catalysis, School of Chemistry and Environment Science, Shaanxi University of Technology, Hanzhong 723001, P.R. China

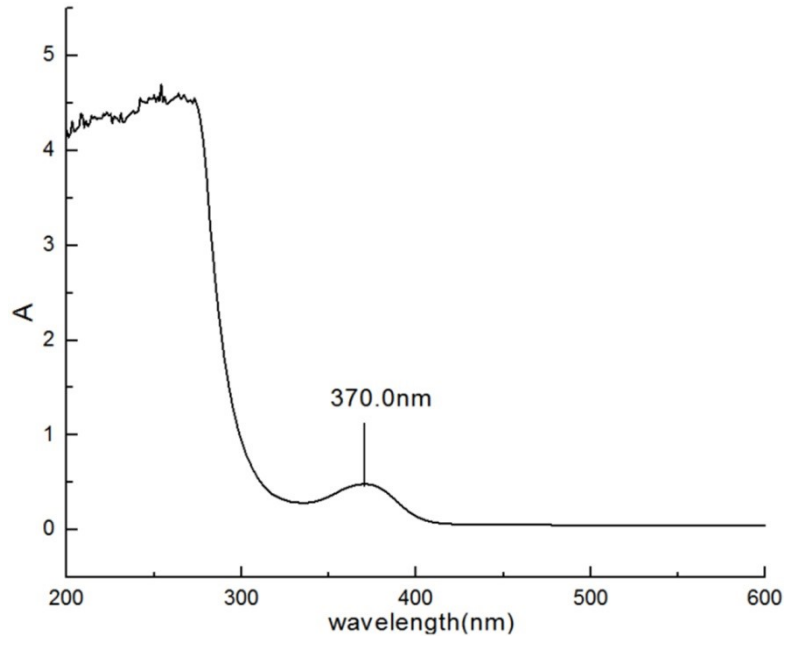

Fig. S1 Maximum absorption wavelength of myricetin standard

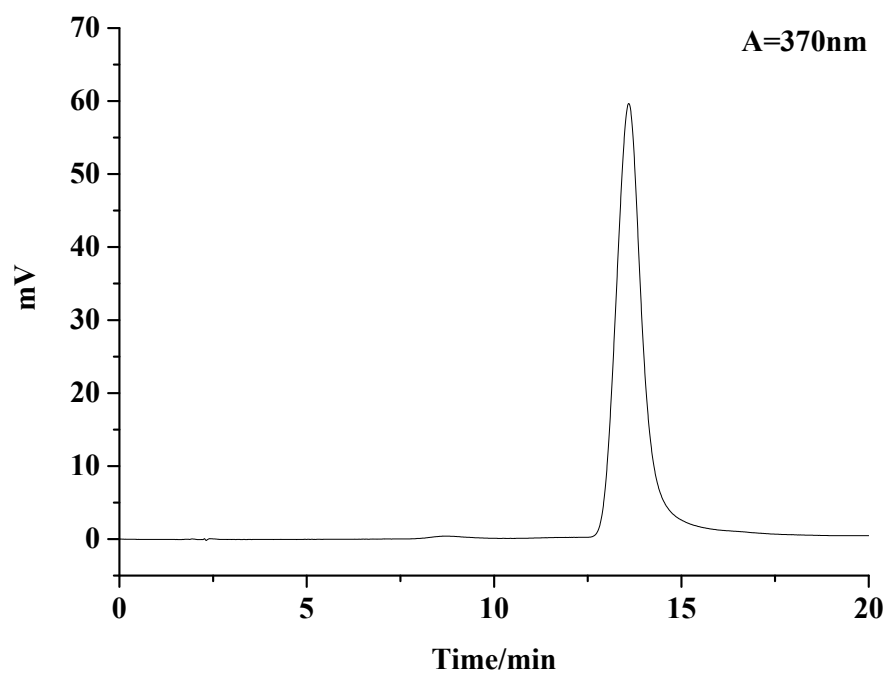

Fig. S2 HPLC chromatogram of the standard sample

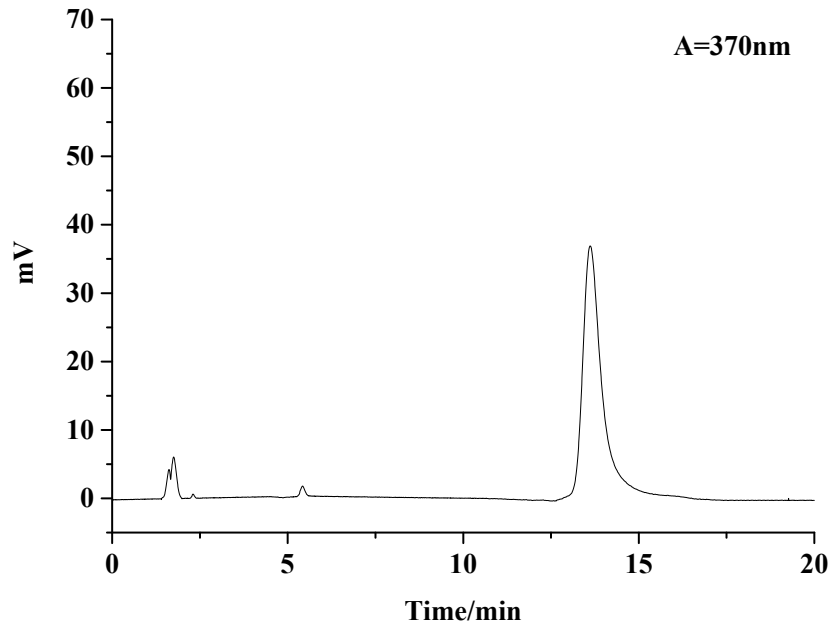

Fig. S3 HPLC chromatogram of the extract

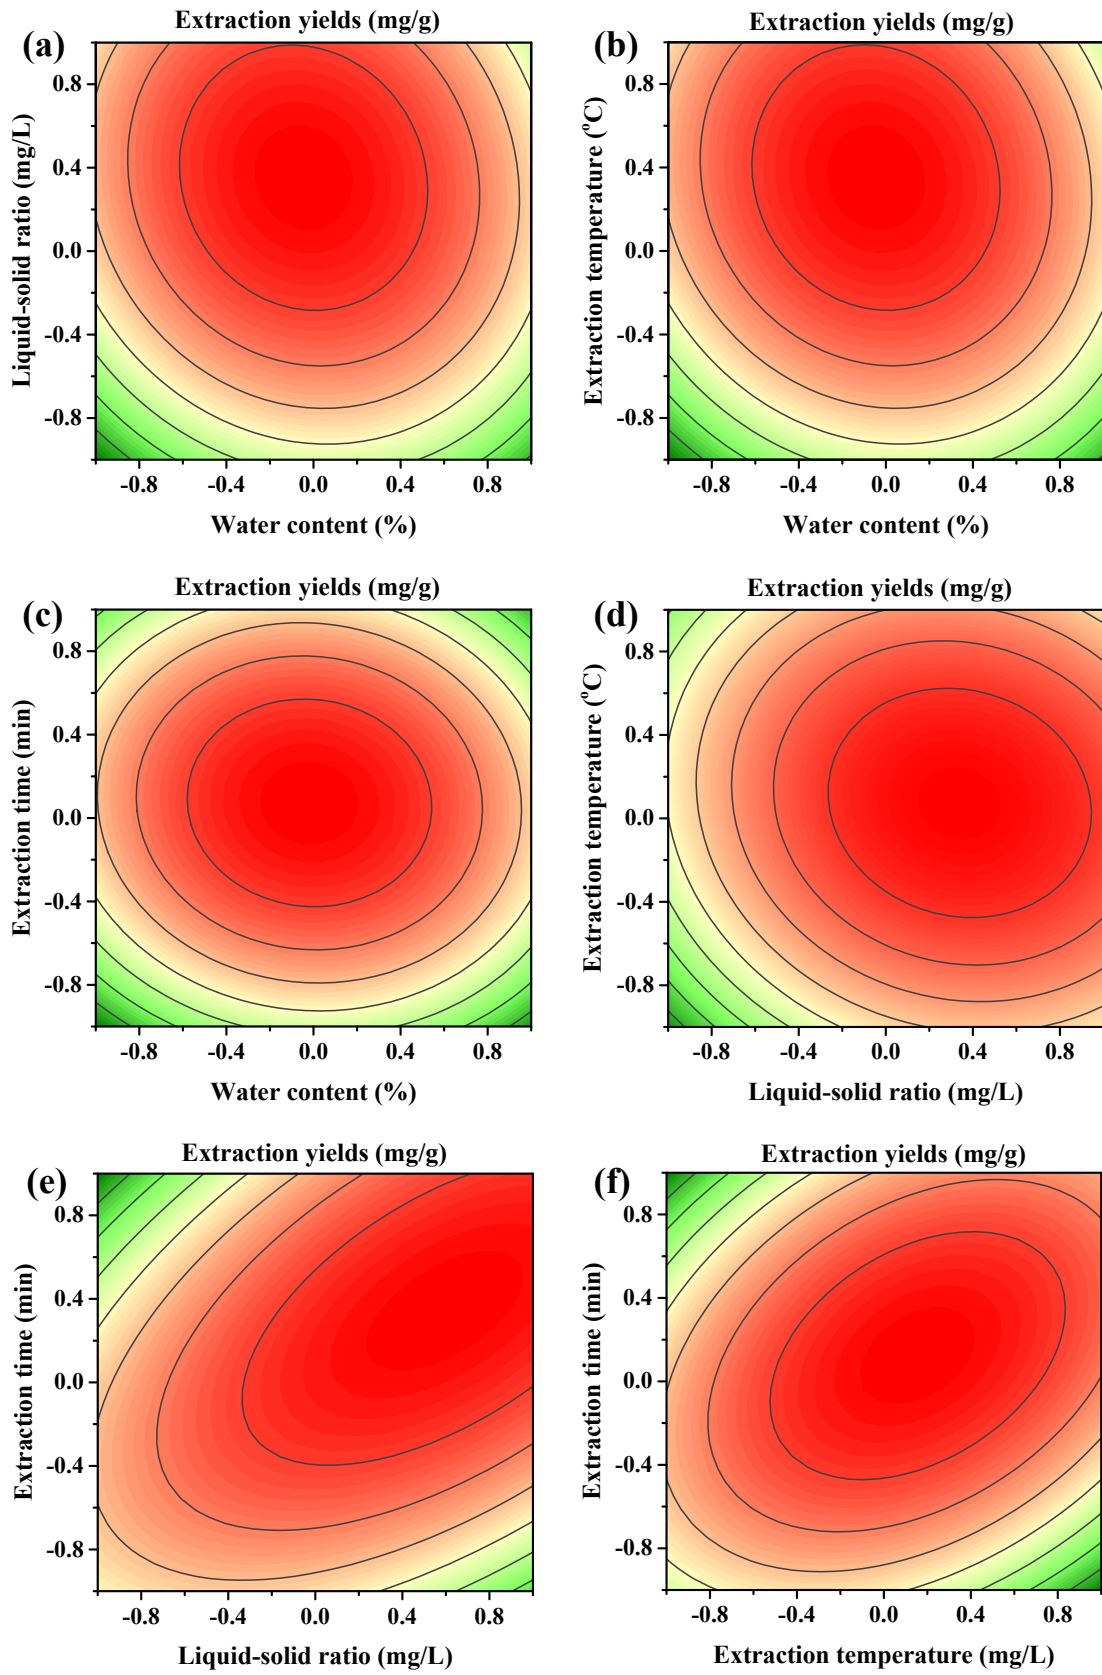

Fig. S4 Contour plots.

Table S1 t test of the model

| Term | Estimate  | Std Err  | t        | Pr >  t  |
|------|-----------|----------|----------|----------|
| A    | -0.0975   | 0.421268 | -0.23144 | 0.820318 |
| B    | 1.7775    | 0.421268 | 4.219402 | 0.000858 |
| C    | 0.635     | 0.421268 | 1.507353 | 0.15395  |
| D    | 0.5833333 | 0.421268 | 1.384708 | 0.187814 |
| A*A  | -3.185083 | 0.572987 | -5.55874 | 0.0001   |
| A*B  | -0.54     | 0.729658 | -0.74007 | 0.471485 |
| A*C  | 0.3       | 0.729658 | 0.411152 | 0.687186 |
| A*D  | -0.2975   | 0.729658 | -0.40773 | 0.689642 |
| B*B  | -2.560083 | 0.572987 | -4.46796 | 0.000531 |
| B*C  | -0.52     | 0.729658 | -0.71266 | 0.487763 |
| B*D  | 3.6925    | 0.729658 | 5.06059  | 0.000174 |
| C*C  | -3.101333 | 0.572987 | -5.41257 | 0.0001   |
| C*D  | 2.67      | 0.729658 | 3.659249 | 0.002577 |
| D*D  | -4.048833 | 0.572987 | -7.06619 | 0.0001   |
